# Supplementary material for: Cell-cell interaction determines cell fate of mesoderm-derived cell in tongue development through Hh signaling
Source: eLife. 2024 Oct 11;13:e85042. doi: 10.7554/eLife.85042 (PMC11469673; doi:10.7554/eLife.85042)
Supplement: Figure 2—figure supplement 1—source data 1. [file elife-85042-fig2-figsupp1-data1.xlsx]

## Sheet: Sheet1
	Figure 2-figgure supplements 1A				Figure 2-figgure supplements 1C
	Myogenin				Trim14
	ETM	HET			WAT	HET
	9.54149	0.00935793			0.958216	0.0176942
	4.40388	0.499734			2.06891	0.488701
	9.55694	0.54047			3.87366	0.271467
	3.14702	1.16758			4.10716	0.00392736
	8.42744	0.681726
	1.15389	0.779211
