# Supplementary material for: Cell-cell interaction determines cell fate of mesoderm-derived cell in tongue development through Hh signaling
Source: eLife. 2024 Oct 11;13:e85042. doi: 10.7554/eLife.85042 (PMC11469673; doi:10.7554/eLife.85042)
Supplement: Figure 2—figure supplement 2—source data 1. [file elife-85042-fig2-figsupp2-data1.xlsx]

## Sheet: Sheet1
	Figure 2-figgure supplements 2B				Figure 2-figgure supplements 2C
	UCP1				Adiponectin
	BAT	HET			BAT	HET
	5.11761	1.25975			0.162543	0.0170116
	121.79	0.307608			1.08103	0.0270411
	3.25478	0.319768			0.0971983	0.0700802
	150.925	0.00280047			0.199596
	2.43757	0.0172125			0.90554
