# Supplementary material for: Cell-cell interaction determines cell fate of mesoderm-derived cell in tongue development through Hh signaling
Source: eLife. 2024 Oct 11;13:e85042. doi: 10.7554/eLife.85042 (PMC11469673; doi:10.7554/eLife.85042)
Supplement: Figure 2—figure supplement 4—source data 1. [file elife-85042-fig2-figsupp4-data1.xlsx]

## Sheet: Sheet1
	Figure 2-figure supplements 4A			Figure 2-figure supplements 4B			Figure 2-figure supplements 4C
	Agt			Trim14			Prdm16
	WAT	HM		WAT	HM		ETM	HM
	0.93931	0.0449054		0.958216	0.00785787		0.230146	7.29207
	5.26606	1.31502		2.06891	0.93343		0.286715	9.21553
	7.8098	0.175096		3.87366	0.00336767		1.00075	4.27303
	5.75427	0.0537268		38.0094	0.0237689		0.099214	160.526
	6.50359	0.0107548		4.10716	0.264391		0.593627	2.45422
		0.394078			0.0330072		0.013205	9.14795
