# Supplementary material for: Cell-cell interaction determines cell fate of mesoderm-derived cell in tongue development through Hh signaling
Source: eLife. 2024 Oct 11;13:e85042. doi: 10.7554/eLife.85042 (PMC11469673; doi:10.7554/eLife.85042)
Supplement: Figure 2—source data 1. [file elife-85042-fig2-data1.xlsx]

## Sheet: Sheet1
Fig. 2A	Agt		Fig. 2B	UCP1		Fig. 2C	PGC1a
	WAT	HET		ETM	HET		WAT	HET
	0.93931	0.0815823		0.000906703	1.25975		0.0337335	2.93216
	5.26606	0.0570462		0.000836879	0.307608		0.0282	1.29481
	7.8098	0.00341458		0.0016472	0.319768		0.05	1.52841
	5.75427			0.000332384	0.0372125		0.0278	0.567504
	6.50359			0			0.087
Fig. 2H	UCP1		Fig. 2I	PGC1a
	ETM	HM		WAT	HM
	0.000906703	0.280687		0.0337335	2.65708
	0.000836879	0.180762		0.0282	0.334648
	0.0016472	0.00476371		0.05	0.236738
	0.000332384	0.00726245		0.0278	0.7682
	0			0.087
