# Supplementary material for: Cell-cell interaction determines cell fate of mesoderm-derived cell in tongue development through Hh signaling
Source: eLife. 2024 Oct 11;13:e85042. doi: 10.7554/eLife.85042 (PMC11469673; doi:10.7554/eLife.85042)
Supplement: Figure 5—figure supplement 1—source data 1. [file elife-85042-fig5-figsupp1-data1.xlsx]

## Sheet: Sheet1
	Figure 5-figure supplements 1E			Figure 5-figure supplements 1F			Figure 5-figure supplements 1G			Figure 5-figure supplements 1H			Figure 5-figure supplements 1I
	Myogenin			Cidea			C/EBPb			Prdm16			UCP1
	ETM	Smo KO		ETM	Smo KO		ETM	Smo KO		ETM	Smo KO		ETM	Smo KO
	9.54149	8.49259		0.0812677	0.677837		254.161	5703.32		0.230146	368367		0.000906703	27.9213
	4.40388	0.393919		0.0859169	0.263585		173.756	8618.99		0.286715	952.747		0.000836879	0.124569
	9.55694	0.400737		0.234485	0.257387		227.123	12115.8		1.00075	3878.08		0.0016472	0.219449
	3.14702	1.47011		0.0455825	0.511543		135.663	38750.8		0.099214	21905.2		0.000332384	0.0572236
	8.42744	0.695638		0.133192	0.582303		155.799	10765.7		0.593627	940.267		0	0.0882362
	1.15389	0.667279			0.6067		2.24574	7705.48		0.013205	1047.28
	Figure 5-figure supplements 1J			Figure 5-figure supplements 1K			Figure 5-figure supplements 1L			Figure 5-figure supplements 1M
	PGC1a			Agt			Trim14			Cidea
	WAT	Smo KO		WAT	Smo KO		WAT	Smo KO		WAT	Smo KO
	0.0337335	2.74922		5.26606	1.22136		2.06891	0.00187074		0.0615198	0.677837
	0.0282	7.23914		7.8098	2.40825		3.87366	1.26349		0.0307154	0.263585
	0.05	21.4861		5.75427	1.6977		38.0094	2.87771		0.0174816	0.257387
	0.0278	2.52422		6.50359	2.00636		4.10716	0.658664		0.0278334	0.511543
	0.087	3.41471			1.8249			1.24316			0.582303
					2.58428						0.6067
