# Supplementary material for: Cell-cell interaction determines cell fate of mesoderm-derived cell in tongue development through Hh signaling
Source: eLife. 2024 Oct 11;13:e85042. doi: 10.7554/eLife.85042 (PMC11469673; doi:10.7554/eLife.85042)
Supplement: Figure 6—figure supplement 2—source data 1. [file elife-85042-fig6-figsupp2-data1.xlsx]

## Sheet: Sheet1
		Figure 6-figure supplements 2C
		Caspase 3
		Wnt1Cre;R26RYFP	Ofd1fl/WT;Wnt1Cre (HET);R26RYFP
		7.57	7.00
		8.38	10.66
		6.51	8.04
		8.91	14.45
		7.01	9.37
		Figure 6-figure supplements 2F
		Ki67
		Wnt1Cre;R26RYFP	Ofd1fl/WT;Wnt1Cre (HET);R26RYFP
		35.5312	50.22222
		59.79557	59.53846
		36.79834	52.39521
		38.06971	53.10245
		44.69274	51.74981
