# Supplementary material for: Cell-cell interaction determines cell fate of mesoderm-derived cell in tongue development through Hh signaling
Source: eLife. 2024 Oct 11;13:e85042. doi: 10.7554/eLife.85042 (PMC11469673; doi:10.7554/eLife.85042)
Supplement: Figure 9—figure supplement 1—source data 1. [file elife-85042-fig9-figsupp1-data1.xlsx]

## Sheet: Sheet1
	Figure 9-figure supplements 1A			Figure 9-figure supplements 1B			Figure 9-figure supplements 1C			Figure 9-figure supplements 1D
	CIDEA			PGC1a			PRDM16			CIDEA
	CHM	OFD1 patient		CHM	OFD1 patient		CHM	OFD1 patient		CHWA	OFD1 patient
	1.24413	422010		1.16432	14311.3		1.04225	7.04215e+07		3614.25	422010
