# Supplementary material for: Cell-cell interaction determines cell fate of mesoderm-derived cell in tongue development through Hh signaling
Source: eLife. 2024 Oct 11;13:e85042. doi: 10.7554/eLife.85042 (PMC11469673; doi:10.7554/eLife.85042)
Supplement: Figure 9—source data 1. [file elife-85042-fig9-data1.xlsx]

## Sheet: Sheet1
	Figure 9M, 9N
	UCP1
	OFD1 patient	CHM	CHWA
	2.71703e+06	1.55329	1.7971e-05
